# Supplementary material
Source: publisher figshare collection journal article supplement (https://acs.figshare.com/ndownloader/files/14077817)
Supplement: Supplementary file 1 [file 14077817]

# **SUPPLEMENATRY INFORMATION**

**for**

## **Photophysical Properties of Thermally Activated Delayed Fluorescent Materials upon Distortion of Central Axis of Donor Moiety**

*Hyung Suk Kim <sup>a</sup>, Hansol Park <sup>a</sup>, So-Ra Park <sup>a</sup>, Sang Hoon Lee <sup>a</sup>, Yunho Ahn <sup>a</sup>, Yong Sup Lee <sup>b</sup>, and Min Chul Suh <sup>a,\*</sup>*

*<sup>a</sup>Department of Information Display, Kyung Hee University, Seoul 02447, Republic of Korea*

*<sup>b</sup>Department of Life and Nanopharmaceutical Sciences, College of Pharmacy, Kyung Hee University, Seoul 02447, Republic of Korea*

**Corresponding Author**

**\*E-mail:** mcsuh@khu.ac.kr

## Appendix. Theoretical background for TADF behavior

Early research<sup>1-3</sup> provided the strategy that minimizes  $\Delta E_{ST}$  to realize TADF character. This corresponds to separating spatial wave function between HOMO and LUMO, under the premise where the main electron configuration (i.e.,  $S_1$  and  $T_1$  states) corresponds to transition from HOMO to LUMO. In this regard, the control of exchange energy ( $J$ ) has been the key rule to destabilize  $S_1$  state and stabilize  $T_1$  state to the same extent, leading to the value of  $\Delta E_{ST} = 2J$ .<sup>4-6</sup> However, small  $\Delta E_{ST}$  by reducing  $J$  results in a negative effect for  $k_r^s$ . The transition dipole moment, from  $S_1$  to the ground state ( $S_0$ ), relies on the oscillator strength ( $f$ ). In conclusion, low  $k_r^s$  is in line with the low PLQY of TADF molecule. Recently, RISC mechanism, supported by the three electronic states ( $S_1$ ,  $T_1$ , and  $S_0$ ), could be more interpreted by locally triplet excited state ( $^3LE$ ).<sup>7-9</sup> Within the framework of Fermi's golden rule,<sup>10-12</sup>  $k_{RISC}$  can be expressed as follows

$$k_{RISC} = \frac{2\pi}{\hbar} |\hat{\mathcal{H}}_{SOC}^{S_1T_1}|^2 \rho_{FC}$$

Eq. (S1)

where  $\hat{\mathcal{H}}_{SOC}^{S_1T_1} = \langle T_1 | \hat{\mathcal{H}}_{SOC} | S_1 \rangle$  is the SOCME between  $T_1$  and  $S_1$  adiabatic electronic states.  $\rho_{FC}$  denotes the Franck-Condon weighted density of states (FCWD)<sup>13</sup> given by

$$\sum_j \sum_k e^{-\frac{E_j}{k_B T}} \langle \nu_k^{final} | \nu_j^{initial} \rangle^2 \delta(E_j^{initial} - E_k^{final})$$

Eq. (S2)

Where  $j$  and  $k$  denote the vibrational state.  $k_B$  is defined as Boltzmann constant and  $T$  is the temperature. An introduction of the canonical partition function ( $e^{-\frac{E_j}{k_B T}}$ ) for vibration motion in the initial electronic state can support Arrhenius-type equation in the high-temperature region.  $\langle \nu_k^{final} | \nu_j^{initial} \rangle$  corresponds to overlap between the vibrational wave functions. Delta function ( $\delta$ ) ensures the energy conservation for the non-radiative transition.  $E_j$  and  $E_k$  denominate the vibrational energy level in the initial and final electronic state, respectively.<sup>14</sup>

<sup>16</sup>  $\rho_{\text{FC}}$  obeys a standard Arrhenius relationship in high  $T$  regime<sup>14</sup>, which implies that  $\rho_{\text{FC}}$  is decreasing the function of  $\Delta E_{\text{ST}}$ . Thus,  $k_{\text{RISC}}$  could take its semi-classical *Marcus* theory expression.<sup>12-14,17-20</sup> (*vide infra*)

$$\sqrt{\frac{1}{4\pi k_B T \lambda_s}} \sum_{n=0}^{\infty} e^{-S} \frac{S^n}{n!} e^{-\frac{(\Delta E_{\text{ST}} + \lambda_M + n\hbar\omega_{\text{eff}})^2}{4k_B T \lambda_s}}$$

Eq. (S3)

Herein, *Marcus* reorganization energy ( $\lambda_s$ ) is associated with intermolecular and intramolecular classical low-frequency modes.  $\hbar\omega_{\text{eff}}$  is the effective energy of a mode involved in transition (non-classical high frequency intramolecular vibrational mode).  $S$  is the effective *Huang-Rhys* factor related to the mentioned modes. An advanced calculation, based on Condon framework (**Eq. S1**) with **Eq. S3** performed by Jean-Luc Brédas *et al.*<sup>12</sup>, provided that strong SOCME value and a small  $\Delta E_{\text{ST}}$  could make the value of  $k_{\text{RISC}}$  achieve  $\sim 10^8 \text{ s}^{-1}$ . This can be also possible albeit SOCME is relatively much smaller than that of phosphorescent material. The first-order perturbation theory could strongly support direct SOC between states ( $^3\text{CT}$ - $^1\text{CT}$  and  $^3\text{LE}$ - $^1\text{CT}$ ) but not include fast equilibrium between triplet states ( $^3\text{LE}$ - $^3\text{CT}$ ). Under the framework of this theory, the mixing between  $T_1$  and  $T_2$  states can be established (*vide infra*)<sup>21</sup>

$$T_2(^3\Psi_{\text{LE}}) = ^3\Psi_{\text{LE}} + \frac{\langle ^3\Psi_{\text{LE}} | \hat{\mathcal{H}}_{\text{vib}} | ^3\Psi_{\text{CT}} \rangle}{^3E_{\text{LE}} - ^3E_{\text{CT}}}$$

Eq. (S4)

The spin-vibronic coupling between  $^3\text{LE}$  and  $^3\text{CT}$  leads to rapid formation of an equilibrium between two states (i.e., non-adiabatic). Thus,  $^3\text{LE}$  state has been dealt with as an essential factor to modulate the photophysical property of TADF material. The actual system ( $^3\text{CT}$  coupled to  $^1\text{CT}$ ) can be dissected by the second-order perturbation theory (**Eq. S5**):<sup>8,16,21-22</sup>

$$k_{\text{RISC}} = \frac{2\pi}{\hbar} \left| \langle {}^1\Psi_{\text{CT}} | \hat{\mathcal{H}}_{\text{SOC}} | {}^3\Psi_{\text{CT}} \rangle + \frac{\langle {}^1\Psi_{\text{CT}} | \hat{\mathcal{H}}_{\text{SOC}} | {}^3\Psi_{\text{LE}} \rangle \langle {}^3\Psi_{\text{LE}} | \hat{\mathcal{H}}_{\text{Vib}} | {}^3\Psi_{\text{CT}} \rangle}{{}^3E_{\text{LE}} - {}^3E_{\text{CT}}} \right|^2 \delta({}^3E_{\text{CT}} - {}^1E_{\text{CT}})$$

Eq. (S5)

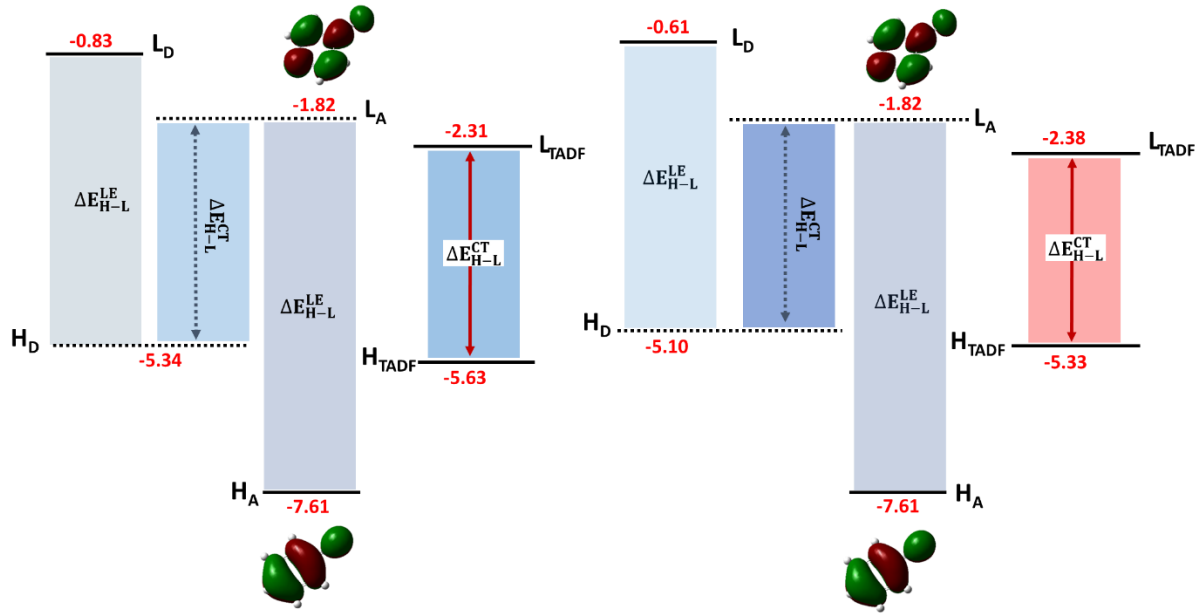

**Figure S1.** Schematic illustration of the HOMO-LUMO energy gap for the donor, acceptor moieties and donor-acceptor-donor TADF molecule.  $H_D$  ( $H_A$ ) and  $L_D$  ( $L_A$ ) corresponds to the HOMO and LUMO of the donor (acceptor) unit, respectively.  $\Delta E_{H-L}^{CT}$  (dotted line) is denoted as the energy gap between  $H_D$  and  $L_A$ . Calculated bandgaps ( $\Delta E_{H-L}^{CT} = L_{TADF} - H_{TADF}$ , solid line) based on TD-DFT at BL3YP hybrid functional and 6-311+G(d). HOMO and LUMO orbital distribution for BN moiety was depicted.

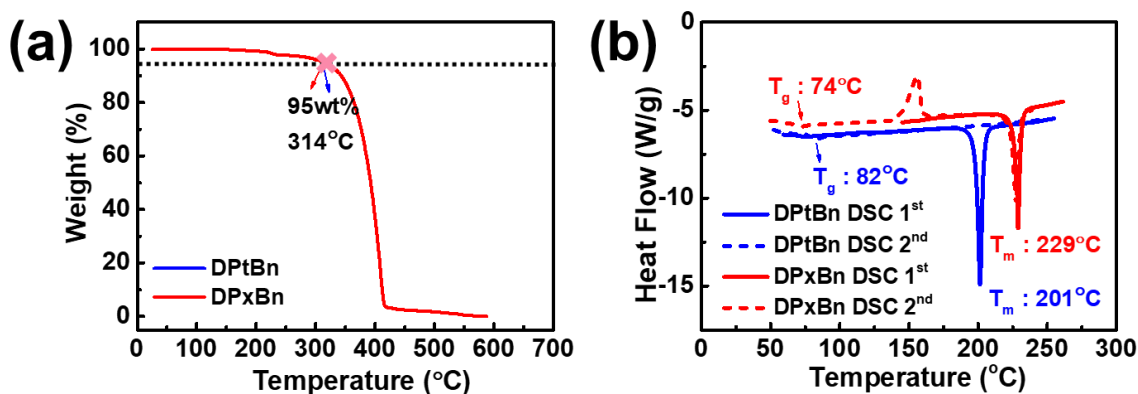

**Figure S2.** (a) TGA (b) DSC traces of DPtBn, and DPxBn.

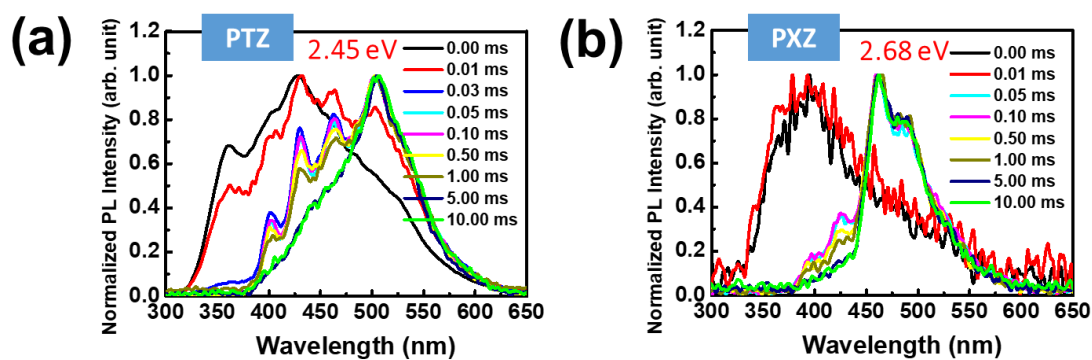

**Figure S3.** Phosphorescence spectra (concentration,  $1.0 \times 10^{-4}$  M in toluene) for PTZ and PXZ donor units within timescale (from 0 to 10 ms) at 77 K and tabulated  $^3\text{LE}_s$  levels.

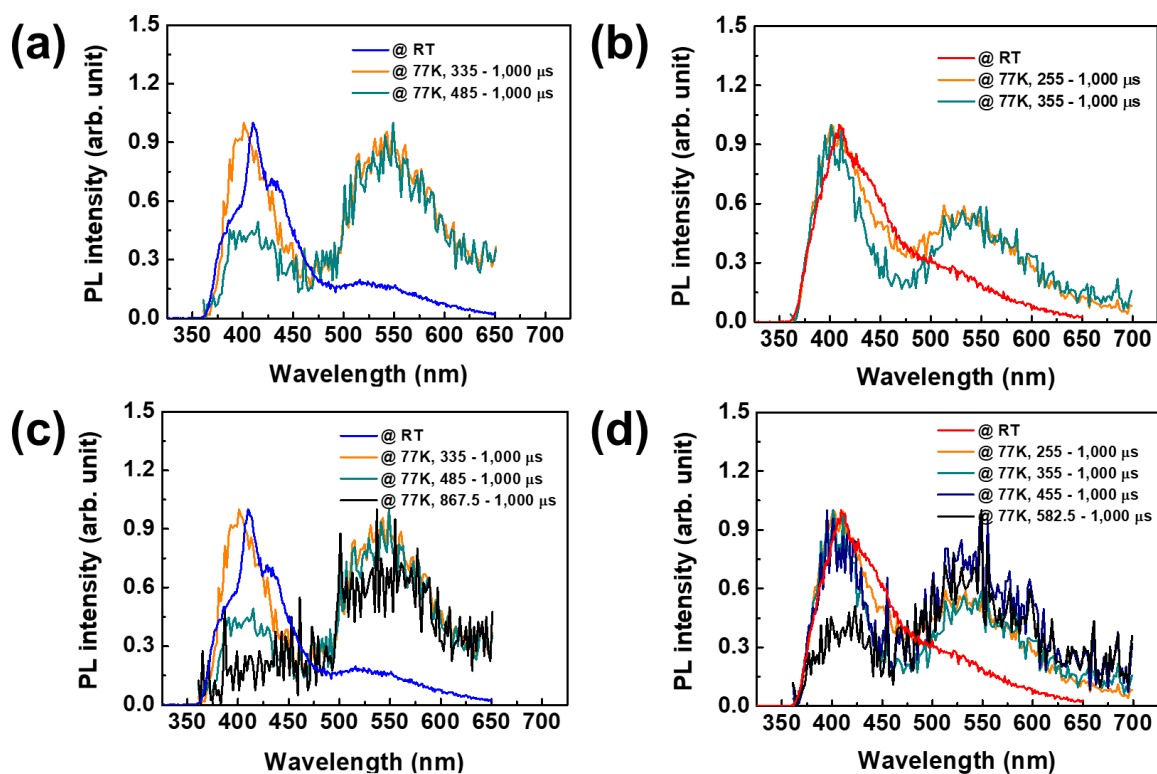

**Figure S4.** Phosphorescence spectra for PTZ (a) and PXZ (b) donor units condensed in *m*-CBP solid film (doping concentration, 5 wt %; film thickness, 30 nm).  $^3\text{LE}_f$  was estimated from Tr-PL decay of spectrum collected at 2 nm interval using TCSPC method at 77K (method, Cryostat equipment). And,  $\lambda_{\text{ex}}$  was 340 nm. The black solid line from (c) and (d) clearly supports the long phosphorescence spectrum of each donor moiety in the solid state window.

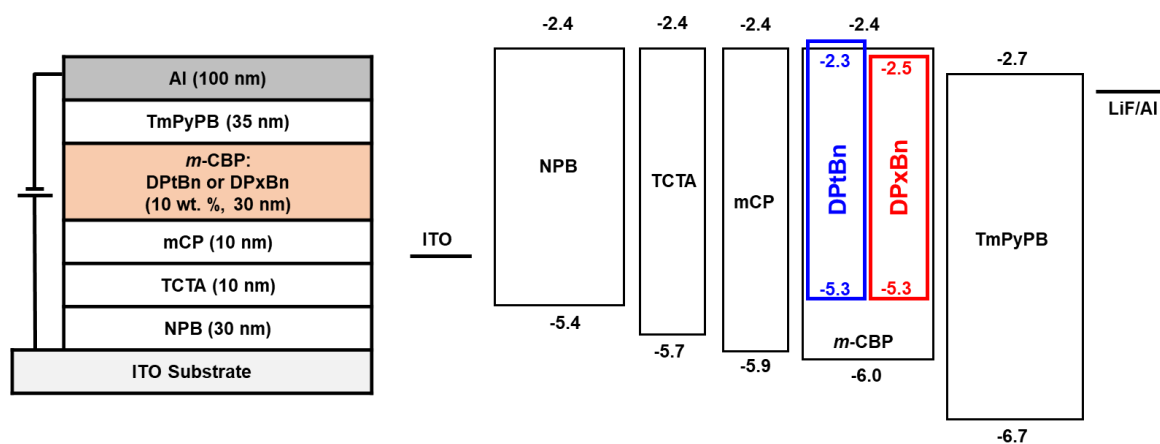

**Figure S5.** Schematic of the device architecture (left) and energy diagram of the OLEDs utilized in this work (right).

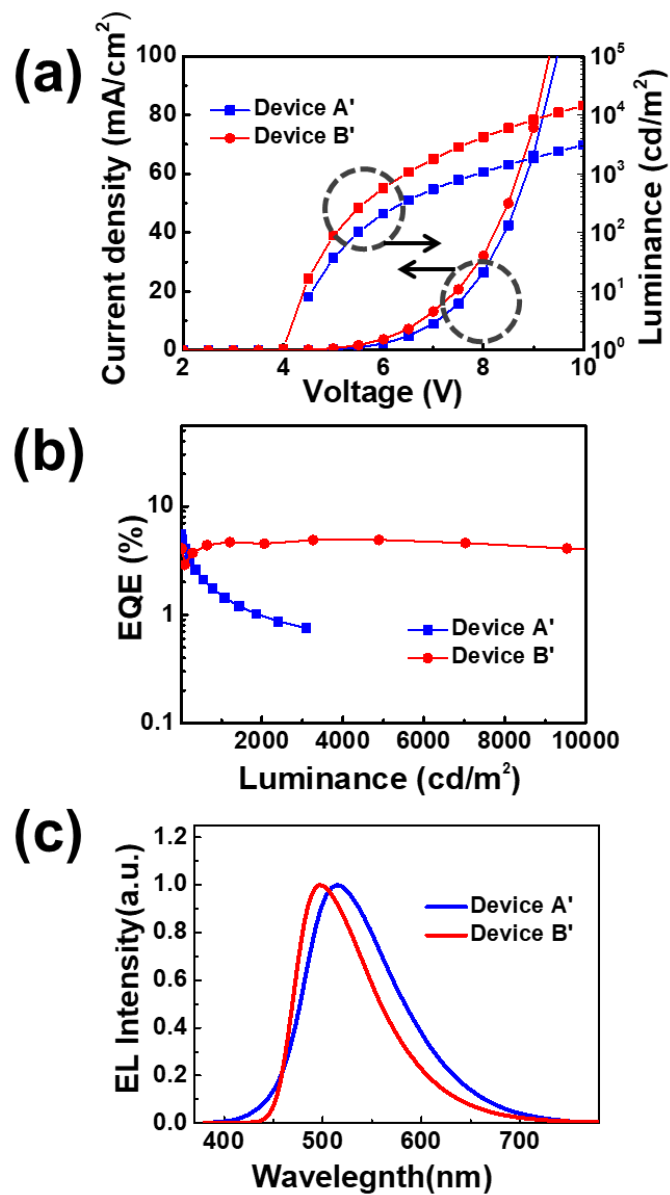

**Figure S6.** (a) *J-V-L* (b) EQE-luminance curves, and (c) EL profiles for device A' and B', respectively



**Table S1. The DFT/TD-DFT Results Based on B3LYP Hybrid Functional**

| target<br>TADF | $S_1^{a,b}$<br>[eV] | $T_1^{a,b}$<br>[eV] | $f^{a,b}$ | HOMO <sup>a</sup><br>[eV] | LUMO <sup>a</sup><br>[eV] | $\alpha^a$ [°] |
|----------------|---------------------|---------------------|-----------|---------------------------|---------------------------|----------------|
| DPtBn          | 2.69                | 2.64                | 0.0004    | -5.55                     | -2.20                     | 106.2          |
| DPxBn          | 2.31                | 2.27                | 0.0001    | -5.22                     | -2.25                     | 96.9           |

<sup>a</sup>The ground state geometries of DPtBn and DPxBn were optimized at the B3LYP/6-311G(d) level in the gas phase. <sup>b</sup>The configurations and energies in the excited states and oscillator strength ( $f$ ) were calculated using TD-DFT at B3LYP/6-311+G(d).

**Table S2. The DFT/TD-DFT Results Based on PBE<sub>0</sub> Hybrid Functional**

| target<br>TADF | $S_1^{a,b}$<br>[eV] | $T_1^{a,b}$<br>[eV] | $f^{a,b}$ | HOMO <sup>a</sup><br>[eV] | LUMO <sup>a</sup><br>[eV] | $\alpha^a$ [°] |
|----------------|---------------------|---------------------|-----------|---------------------------|---------------------------|----------------|
| DPtBn          | 2.83                | 2.75                | 0.0005    | -5.74                     | -2.09                     | 109.0          |
| DPxBn          | 2.50                | 2.43                | 0.0001    | -5.42                     | -2.09                     | 97.4           |

<sup>a</sup>The ground state geometries of DPtBn and DPxBn were optimized at the PBE<sub>0</sub>/6-311G(d) level in the gas phase. <sup>b</sup>The configurations and energies in the excited states and  $f$  were calculated using TD-DFT at PBE<sub>0</sub>/6-311+G(d).

**Table S3. The DFT/TD-DFT Results Based on LC- $w$ PBE Long-Range Corrected Exchange-Correlation Functional**

| target<br>TADF | $S_1^{a,b}$<br>[eV] | $T_1^{a,b}$<br>[eV] | $f^{a,b}$ | HOMO <sup>a</sup><br>[eV] | LUMO <sup>a</sup><br>[eV] | $\alpha^a$ [°] |
|----------------|---------------------|---------------------|-----------|---------------------------|---------------------------|----------------|
| DPtBn          | 2.46                | 2.42                | 0.0004    | -5.55                     | -2.20                     | 106.2          |
| DPxBn          | 2.47                | 2.42                | 0.0001    | -5.22                     | -2.25                     | 96.9           |

<sup>a</sup>The ground state geometries of DPtBn and DPxBn were optimized at the B3LYP/6-311G(d) level in the gas phase. <sup>b</sup>The configurations and energies in the excited states and  $f$  were calculated using TD-DFT at LC- $w$ PBE/6-311+G(d) where the parameter  $w$  was 0.11 and 0.15 for DPtBn and DPxBn, respectively

**Table S4. The DFT/TD-DFT Results Based on LC- $w$ PBE Long-Range Corrected Exchange-Correlation Functional**

| target<br>TADF | $S_1^{a,b}$<br>[eV] | $T_1^{a,b}$<br>[eV] | $f^{a,b}$ | HOMO <sup>a</sup><br>[eV] | LUMO <sup>a</sup><br>[eV] | $\alpha^a$ [°] |
|----------------|---------------------|---------------------|-----------|---------------------------|---------------------------|----------------|
| DPtBn          | 2.37                | 2.33                | 0.0006    | -5.53                     | -2.24                     | 109.9          |
| DPxBn          | 2.42                | 2.34                | 0.0005    | -5.26                     | -2.18                     | 109.4          |

<sup>a</sup>The ground state geometries of DPtBn and DPxBn were optimized at the LC- $w$ PBE/6-311G(d) level in the gas phase ( $w = 0.05$ ). <sup>b</sup>The configurations and energies in the excited states and  $f$  were calculated using TD-DFT at LC- $w$ PBE/6-311+G(d) where the parameter  $w$  was 0.11 and 0.14 for DPtBn and DPxBn, respectively.

**Table S5. The DFT/TD-DFT Results Based on LC-*w*PBE Long-Range Corrected Exchange-Correlation Functional with Solvation Model Based on Density (SMD)**

| target<br>TADF | $S_1^{a,b}$<br>[eV] | $T_1^{a,b}$<br>[eV] | $f^{a,b}$ | HOMO <sup>a</sup><br>[eV] | LUMO <sup>a</sup><br>[eV] | $\alpha^a$ [°] |
|----------------|---------------------|---------------------|-----------|---------------------------|---------------------------|----------------|
| DPtBn          | 2.43                | 2.39                | 0.0006    | -5.54                     | -2.06                     | 107.2          |
| DPxBn          | 2.51                | 2.45                | 0.0002    | -5.13                     | -2.07                     | 100.0          |

<sup>a</sup>The ground state geometries of DPtBn and DPxBn were optimized at the SMD/LC-*w*PBE/6-311G(d) level dissolved in the toluene ( $w = 0.05$ ). <sup>b</sup>The configurations and energies in the excited states and  $f$  were calculated using TD-DFT at SMD/LC-*w*PBE/6-311+G(d) where the parameter  $w$  was 0.11 and 0.15 for DPtBn and DPxBn, respectively.

**Table S6. Summary of OLEDs Device with Target TADF (DPtBn, DPxBn) Emitter**

| item      | $V_{on}^a/V_{op}^b$ (V) | CE//PE//EQE (cd/A//lm/W//%) |                           | CIE (x,y) <sup>b</sup> |
|-----------|-------------------------|-----------------------------|---------------------------|------------------------|
|           |                         | maximum                     | at 1000 cd/m <sup>2</sup> |                        |
| device A' | 4.1/7.9                 | 16.0/11.2/5.6               | 4.3/1.7/1.5               | (0.30,0.49)            |
| device B' | 3.9/6.4                 | 15.6/9.1/4.9                | 14.9/7.3/4.6              | (0.24,0.45)            |

<sup>a</sup> Measured at 1 cd/m<sup>2</sup>. <sup>b</sup> Measured at 1,000 cd/m<sup>2</sup>.

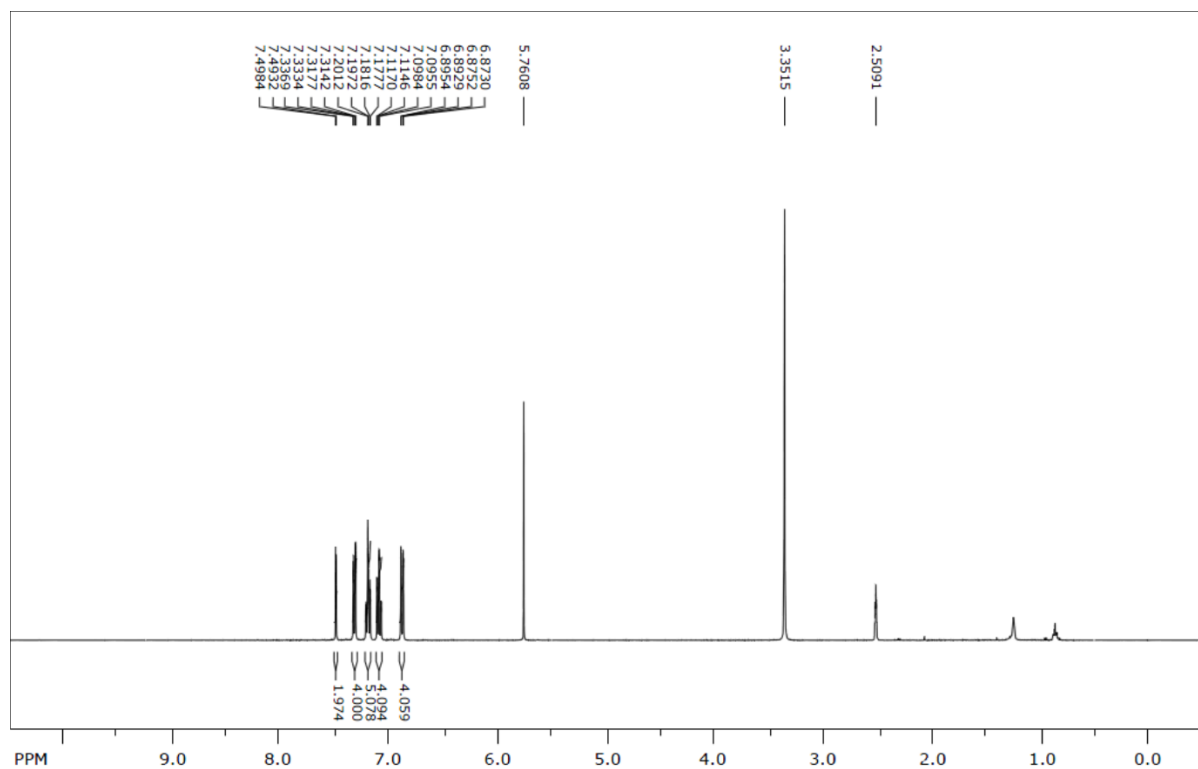

**Figure S7.** <sup>1</sup>H NMR spectrum of DPtBn

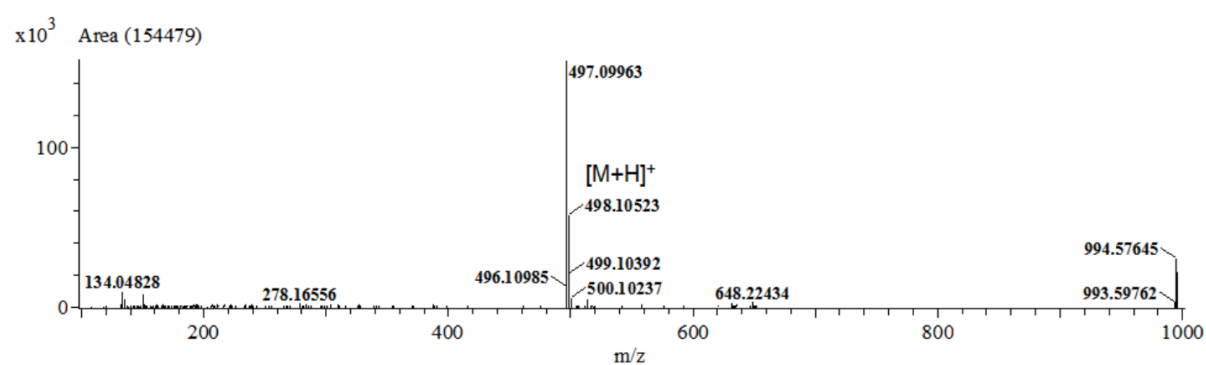

**Figure S8.** HR-MS spectrum of DPtBn

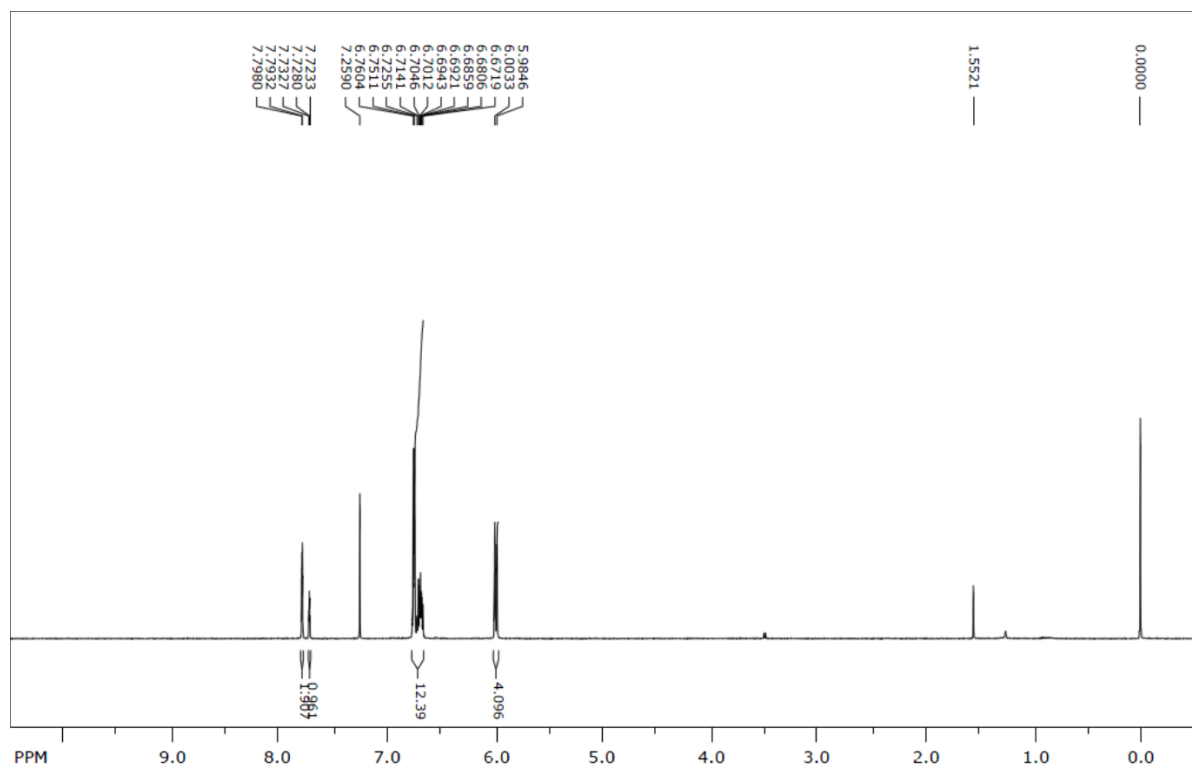

**Figure S9.**  $^1\text{H}$  NMR spectrum of DPxBn.

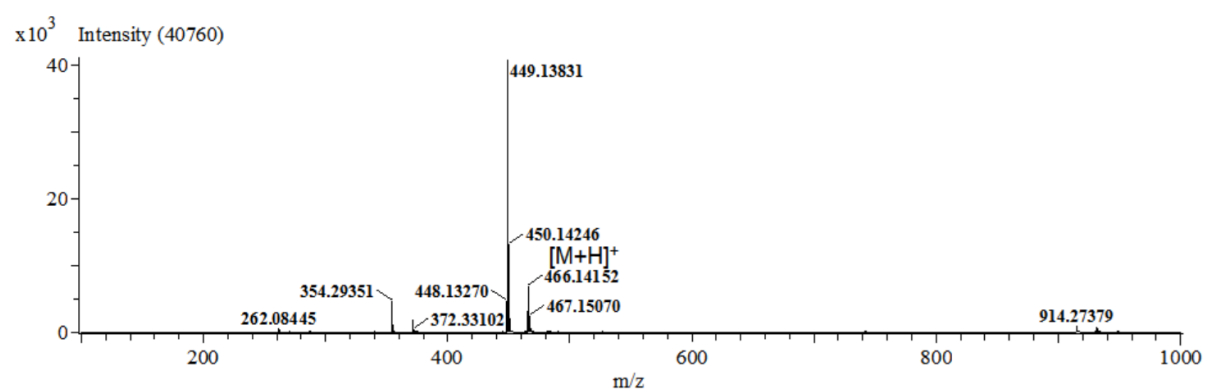

**Figure S10.** HR-MS spectrum of DPxBn.

## REFERENCE

- [1] Hirata, S.; Sakai, Y.; Masui, K.; Tanaka, H.; Lee, S. Y.; Nomura, H.; Nakamura, N.; Yasumatsu, M.; Nakanotani, H.; Zhang, Q.; et al. Highly Efficient Blue Electroluminescence based on Thermally Activated Delayed Fluorescence *Nat. Mater.* **2015**, 14, 330336.
- [2] Sato, K.; Shizu, K.; Yoshimura, K.; Kawada, H.; Miyazaki, Adachi. C. Organic Luminescent Molecule with Energetically Equivalent Singlet and Triplet Excited States for Organic Light-Emitting Diodes. *Phys. Rev. Lett.* **2013**, 110, 247401.
- [3] Wong, M. Y.; Zysman-Colman, E. Purely Organic Thermally Activated Delayed Fluorescence Materials for Organic Light-Emitting Diodes. *Adv. Mater.* **2017**, 29, 1605444.
- [4] Tao, Y.; Yuan, K.; Chen, T.; Xu, P.; Li, H. Chen, R.; Zheng, C.; Zhang, L.; Huang, W. Thermally Activated Delayed Fluorescence Materials Towards the Breakthrough of Organoelectronics. *Adv. Mater.* **2014**, 26, 7931-7958.
- [5] Yang, Z.; Mao, Z.; Xie, Z.; Zhang, Y.; Liu, S.; Zhao, J.; Xu, J.; Chi, Z.; Aldred, M. P. Recent Advances in Organic Thermally Activated Delayed Fluorescence Materials. *Chem. Soc. Rev.* **2017**, 47, 915-1016.
- [6] Köhler, A.; Bässler, H. Triplet States in Organic Semiconductors. *Mater. Sci. Eng., R* **2009**, 66, 71-109.
- [7] Dias, F. B.; Santos, J.; Graves, D. R.; Data, P.; Nobuyase, R. S.; Fox, M. A.; Batsanov, A. S.; Palmeira, T.; Berberan-Santos, M. N.; Bryce, M. R.; et al. The Role of Local Triplet Excited States and D-A Relative Orientation in Thermally Activated Delayed Fluorescence: Photophysics and Devices. *Adv. Sci.* **2016**, 3, 1600080.
- [8] Etherington, M. K.; Gibson, J.; Higginbotham, H. F.; Penfold, T. J.; Monkman, A. P. Revealing the Spin–Vibronic Coupling Mechanism of Thermally Activated Delayed Fluorescence. *Nat. Commun.* **2016**, 7, 13680.
- [9] Nobuyasu, R. S.; Ren, Z.; Griffiths, G. C.; Batsanov, A. S.; Data, P.; Yan, S.; Monkman, A. P.; Bryce, M. R.; Dias, F. B. Rational Design of TADF Polymers Using a Donor–Acceptor Monomer with Enhanced TADF Efficiency Induced by the Energy Alignment of Charge Transfer and Local Triplet Excited States. *Adv. Opt. Mater.* **2016**, 4, 597-607.
- [10] Lawetz, V.; Siebrand, W.; Orlandi, G. Theory of Intersystem Crossing in Aromatic Hydrocarbons *J. Chem. Phys.* **1972**, 56, 4058-4072.
- [11] Robinson, G. W.; Frosch, R. P. Electronic Excitation Transfer and Relaxation. *J. Chem. Phys.* **1963**, 38, 1187-1203.
- [12] Samanta, P. K.; Kim, D.; Coropceanu, V.; Brédas, J. –L. Up-Conversion Intersystem Crossing Rates in Organic Emitters for Thermally Activated Delayed Fluorescence: Impact of the Nature of Singlet vs Triplet Excited States. *J. Am. Chem. Soc.* **2017**, 139, 4042-4051.
- [13] Chen, X. K.; Zhang, S. F.; Fan, J. X.; Ren, A. M. Nature of Highly Efficient Thermally Activated Delayed Fluorescence in Organic Light-Emitting Diode Emitters: Nonadiabatic Effect between Excited States. *J. Phys. Chem. C* **2015**, 119, 9728-9733.
- [14] Marian, C. M. Spin–Orbit Coupling and Intersystem Crossing in Molecules *Mol. Sci.* **2012**, 2, 187–203.
- [15] Rice, O. K. Perturbations in Molecules and the Theory of Predissociation and Diffuse Spectra. II *Phys. Rev.* **1930**, 35, 1551–1558.
- [16] Dias, F. B.; Penfold, T. J.; Monkman, A. P. Photophysics of Thermally Activated Delayed Fluorescence Molecules. *Methods Appl. Fluoresc.* **2017**, 5, 012001.
- [17] Brédas, J. –L.; Belijonne, D.; Coropceanu, V.; Cornil, J. Charge-Transfer and Energy-Transfer Processes in  $\pi$ -Conjugated Oligomers and Polymers: A Molecular Picture. *Chem. Rev.* **2004**, 104, 4971-5003.
- [18] Schmidt, K.; Brovelli, S.; Coropceanu, V.; Belijonne, D.; Cornil, J.; Bazzini, C.; Caronna, T.; Tubino, R.; Meinardi, F.; Shuai, Z.; Brédas, J. –L. Intersystem Crossing Processes in Nonplanar Aromatic Heterocyclic Molecules. *J. Phys. Chem. A* **2007**, 111, 10490-10499.
- [19] Gibson, J.; Monkman, A. P.; Penfold, T. J. The Importance of Vibronic Coupling for Efficient Reverse Intersystem Crossing in Thermally Activated Delayed Fluorescence Molecules. *ChemPhysChem* **2016**, 17, 2956-2961.
- [20] Marcus, R. A. Nonadiabatic Processes Involving Quantum-Like and Classical-Like Coordinates with Applications to Nonadiabatic Electron Transfers. *J. Chem. Phys.* **1984**, 81, 4494-4500.
- [21] Gibson, J.; Penfold, T. J. Nonadiabatic Coupling Reduces the Activation Energy in Thermally Activated Delayed Fluorescence. *Phys. Chem. Chem. Phys.* **2017**, 19, 8428-8434.
- [22] Henry, B. R.; Siebrand, W. Spin–Orbit Coupling in Aromatic Hydrocarbons. Analysis of Nonradiative Transitions between Singlet and Triplet States in Benzene and Naphthalene. *J. Chem. Phys.* **1971**, 54, 1072.
